# Supplementary material for: A standardised semi-dynamic in vitro digestion method suitable for food – an international consensus
Source: Royal Society of Chemistry journal article supplement (doi:10.1039/c9fo01293a), 2020-01-01
Supplement: c9fo01293a2.xlsx [file c9fo01293a2.xlsx]

## Sheet: GI Digestion Steps
	Cells in yellow require user input
	Food composition
		% Sample	kcal/mL
	Lipid	5	0.45
	Protein	3.8	0.152
	Carbohydrate	5	0.2
	Total Calories		0.802
	Dry weigh	15
	Oral digestion step						Amylase
	Duration (time amylase is active in food)	2	min				Salivary amylase	150	IU/mL SSF
	Quantity of food			20			Sigma amylase A1031
	Dry Weight of Food			3	mL		Lot number
	Volume of eSSF			2.4	mL		Activity IU/mg solid	100
	0.3M CaCl2(H2O)2			15	mL			450	U needed at	3000	U/mL
	Salivary Amylase solution			0.15	mL		weight needed	4.5	mg
							weighed	5	mg of Amylase
	Water required to	3	mL =	0.435	mL		concentration	30	mg/mL in water
							volume of water	0.166667	ml
	Sampling volume (if any)			0	mL
	Final Volume oral phase			23	mL
	Gastric digestion step			volume				Basal						Pepsin (without use of gastric lipase)						Gastric Lipase + Pepsin
	Duration	200.5	min			Delivery Rate		eSGF			1.61	mL								With Gastric Lipase (RGE)
	Fixed volumes							HCl	1.5	M	0.2	mL		Pepsin	4000	U/ml SGF				Gastric Lipase	120	U/ml SGF
	Volume of bolus			23	mL			0.3M CaCl2(H2O)2			1.15	mL		Sigma pepsin P7012						Supplier
	Volume of eSGF			16.1	mL			Water			0.25885	mL		lot number						lot number
	RGE solution			1.15	mL			Enzyme solution			0.23	mL		Activity U/mg solid	3000					Lipase Activity U/mg solid	200
	Pepsin solution			1.15	mL			Total volume			2.3	mL			92000	U needed at	80000	U/ml			2760	U needed at	2400	U/ml
	0.3M CaCl2(H2O)2			11.5	mL									weight needed	30.6667	mg				weight needed	13.8	mg
														weighed	40	mg of pepsin				weighed	14	mg of RGE for 1 tube
	Variable volumes													concentration	26.6667	mg/ml in eSGF				concentration	12	mg/ml in eSGF
	HCl to reach pH 2.0 at	1.5	M	2	mL			Simulated gastric electrolyte mixture						volume of water	1.5	ml				volume of water	1.16667	ml
	Water required to	46	mL =	2.5885	mL			eSGF			14.49	mL
								HCl	1.5	M	1.8	mL								Pepsin	4000	U/ml SGF
								0.3M CaCl2(H2O)2			10.35	mL								Pepsin Activity U/mg RGE solid	1500
	Basal volume pH adjusted to 2			2.3	mL			Water			2.32965	mL								Total Pepsin activity needed	92000	U needed at	80000	U/ml
	90% electrolyte mixture			18.63	mL at	0.0929177	mL/min	Total volume			18.63	mL								Pepsin Activity U/mg provided by RGE	20700	U
	90% enzyme solution			2.07	mL at	0.0103242	mL/min
	Emptying							Note: no enzyme solution												Sigma pepsin P7012
	Number of emptying steps (3<n<10)			10																lot number
	Emptying time, every			20.05	min															Activity U/mg solid	3000
	Emptying volume			4.6	mL															Pepsin activity U/mg provided by pepsin	71300	U needed at	62000	U/ml
																				weight needed	23.7667	mg
																				weighed	30	mg of Pepsin
																				concentration	1.03333	mg/ml in eSGF
																				volume of water	29.0323	ml
	In case individual enzymes are used: fill out the boxes for individual enzymes, Bile, Trypsin, Chymotrypsin, Lipase, Colipase and Amylase
	Small intestinal digestion step (Pancreatin)						Pancreatin
	Duration	120	mins				pancreatin	200	(TAME) U of trypsin /ml SIF
	Volume of chyme			4.6	mL		sigma pancreatin P7545
	Volume of eSIF			2.875	mL		lot number
	Pancreatin			0.23	mL		Activity U/mg solid	300
	Bile			0.575	mL			920	U needed	4000	U/mL
	Volume of 0.3M CaCl2(H2O)2			9.2	mL		weight needed	3.06667	mg
							weighed	7	mg of pancreatin
	Vol of 1M acid/base for pH 7.0			0.5	mL		concentration	13.3333	mg/ml in eSIF
							volume of eSIF	0.525	ml
	Water required to	9.2	ml	0.4108	mL
	Total volume to be removed for sampling			0	mL		Bile
	during intestinal stage (ml)						bile	20	mmol/L SIF
							sigma bile extract B3883
	Final intestinal volume			0	mL		lot number
							concentration	1.19	mmol of bile salts/g bile
							mmols needed	0.092	mmol needed	0.16	mol/L
							weight needed	77.3109	mg
							weighed	160	mg
							concentration	134.454	mg/ml in eSIF
							volume of eSIF	1.19	ml
	Small intestinal digestion step (Individual enzymes)						Trypsin
	Volume of chyme			4.6	mL		trypsin	200	(TAME) U/ml SIF
	Volume of eSIF			1.955	mL		sigma trypsin T0303
	Trypsin			0.23	mL		lot number
	Chymotrypsin			0.23	mL		Activity U/mg	200
	Lipase			0.23	mL			920	U needed	4000	U/mL
	Co-lipase			0.23	mL		weigth needed	4.6	mg
	Amylase			0.23	mL		weighed	10	mg
	Bile			0.575	mL		concentration	20	mg in eSIF
	Volume of 0.3M CaCl2(H2O)2			9.2	mL		volume of eSIF	0.5	mL
	Vol of 1M acid/base for pH 7.0			0.5	mL		Chymotrypsin
							chymotrypsin	50	(BTEE) U/ml SIF
	Water required to	9.2	ml	0.4108	mL		sigma chymotrypsin C4129
							lot number
	Total volume to be removed for sampling			0	mL		Activity U/mg	200
	during intestinal stage (ml)							230	U needed	1000	U/mL
							weigth needed	1.15	mg
	Final intestinal volume			9.2	mL		weighed	3	mg
							concentration	5	mg/mL in eSIF
							volume of eSIF	0.6	mL
							Lipase
							lipase	4000	(tributrin) U/ml SIF
							sigma lipase L3126
							lot number
							Activity U/mg	200
								18400	U needed	80000	U/mL
							weigth needed	92	mg
							weighed	200	mg
							concentration	400	mg/mL in eSIF
							volume of eSIF	0.5	mL
							Colipase
							colipase			Pure (active) lipase assumed to be 8000 U/mg
							Sigma co-lipase C3028			mg active lipase	2.3	mg
							lot number			2:1 molar ratio co lipase to lipase	0.92	mg
							quantity required	0.92	mg needed
							weighed	2	mg
							concentration	4	mg/ml in eSIF
							volume of eSIF	0.5	ml
							Amylase
							amylase	400	U/mL SIF
							sigma amylase A3176
							lot number
							Activity U/mg	200
								1840	U needed	8000	U/mL
							weight needed	9.2	mg
							weighed	20	mg
							concentration	40	mg/mL in eSIF
							volume of eSIF	0.5	mL

## Sheet: Gastric Emptying
		in vitro	in vivo		Time of emptying (min)	Actual gastric volume (mL)	Secretion volume (mL)	Volume to empty (mL)		Linear rate
	Quantity of food	20	500		0	25.3	0			1		0
	Oral volume (mL)	3	75		20.05	22.77	2.07	4.6		0.9		1
	Basal volume (mL)	2.3	57.5		40.1	20.24	4.14	4.6		0.8		2
	Gastric volume (Food+oral +basal) at t=0	25.3	632.5		60.15	17.71	6.21	4.6		0.7		3
	Energy content of meal (Kcal)	16.04	401		80.2	15.18	8.28	4.6		0.6		4
	Energy emptying rate (kcal/min)	0.08	2		100.25	12.65	10.35	4.6		0.5		5
	Volume emptying rate (mL/min)	0.126185	3.15461		120.3	10.12	12.42	4.6		0.4		6
	T 1/2 (min)	100.25	100.25		140.35	7.59	14.49	4.6		0.3		7
	Gastric secretion volume (mL)	20.7			160.4	5.06	16.56	4.6		0.2		8
	Total digestion time (min)	200.5			180.45	2.53	18.63	4.6		0.1		9
	Number of time steps	10			200.5	-5.61773e-15	20.7	4.6		-2.22045e-16		10
	Gastric fluid rate (mL/min)	0.103242
